# Supplementary material for: Mass GGBFS Concrete Mixed with Recycled Aggregates as Alkali-Active Substances: Workability, Temperature History and Strength
Source: MDPI journal article supplement (doi:10.3390/ma16165632), 2023-08-15
Supplement: s1 [file s1]

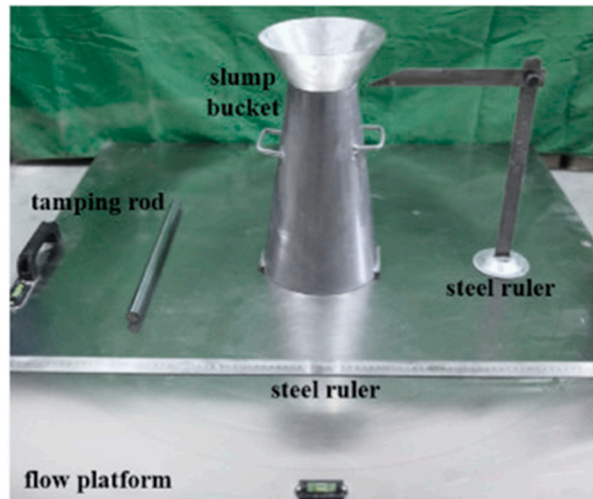

Slump test

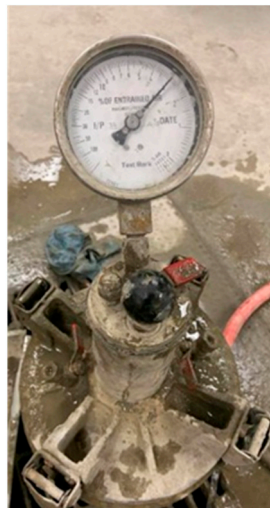

Air content test

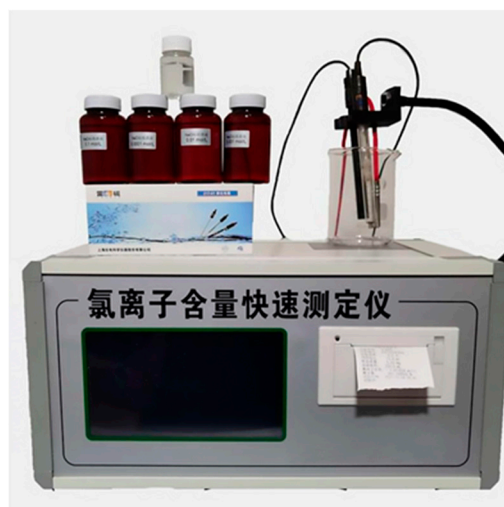

Chloride content test

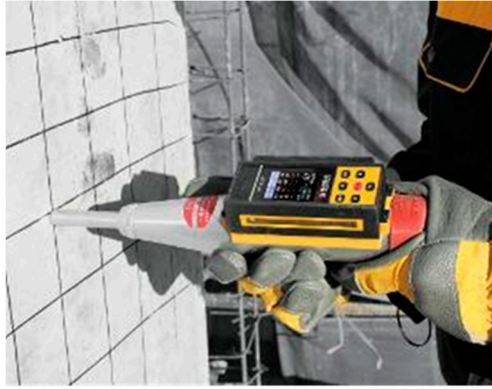

Rebound number test

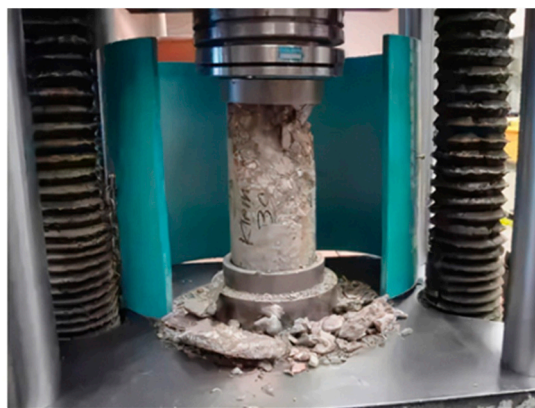

Compressive strength test
